# Supplementary material
Source: Elsevier journal article supplement (https://www.sciencedirect.com/science/article/pii/S0213911117303072)

**Archivos suplementarios material on line (Supplementary files) Archivos suplementarios material on line (Supplementary files) ­**


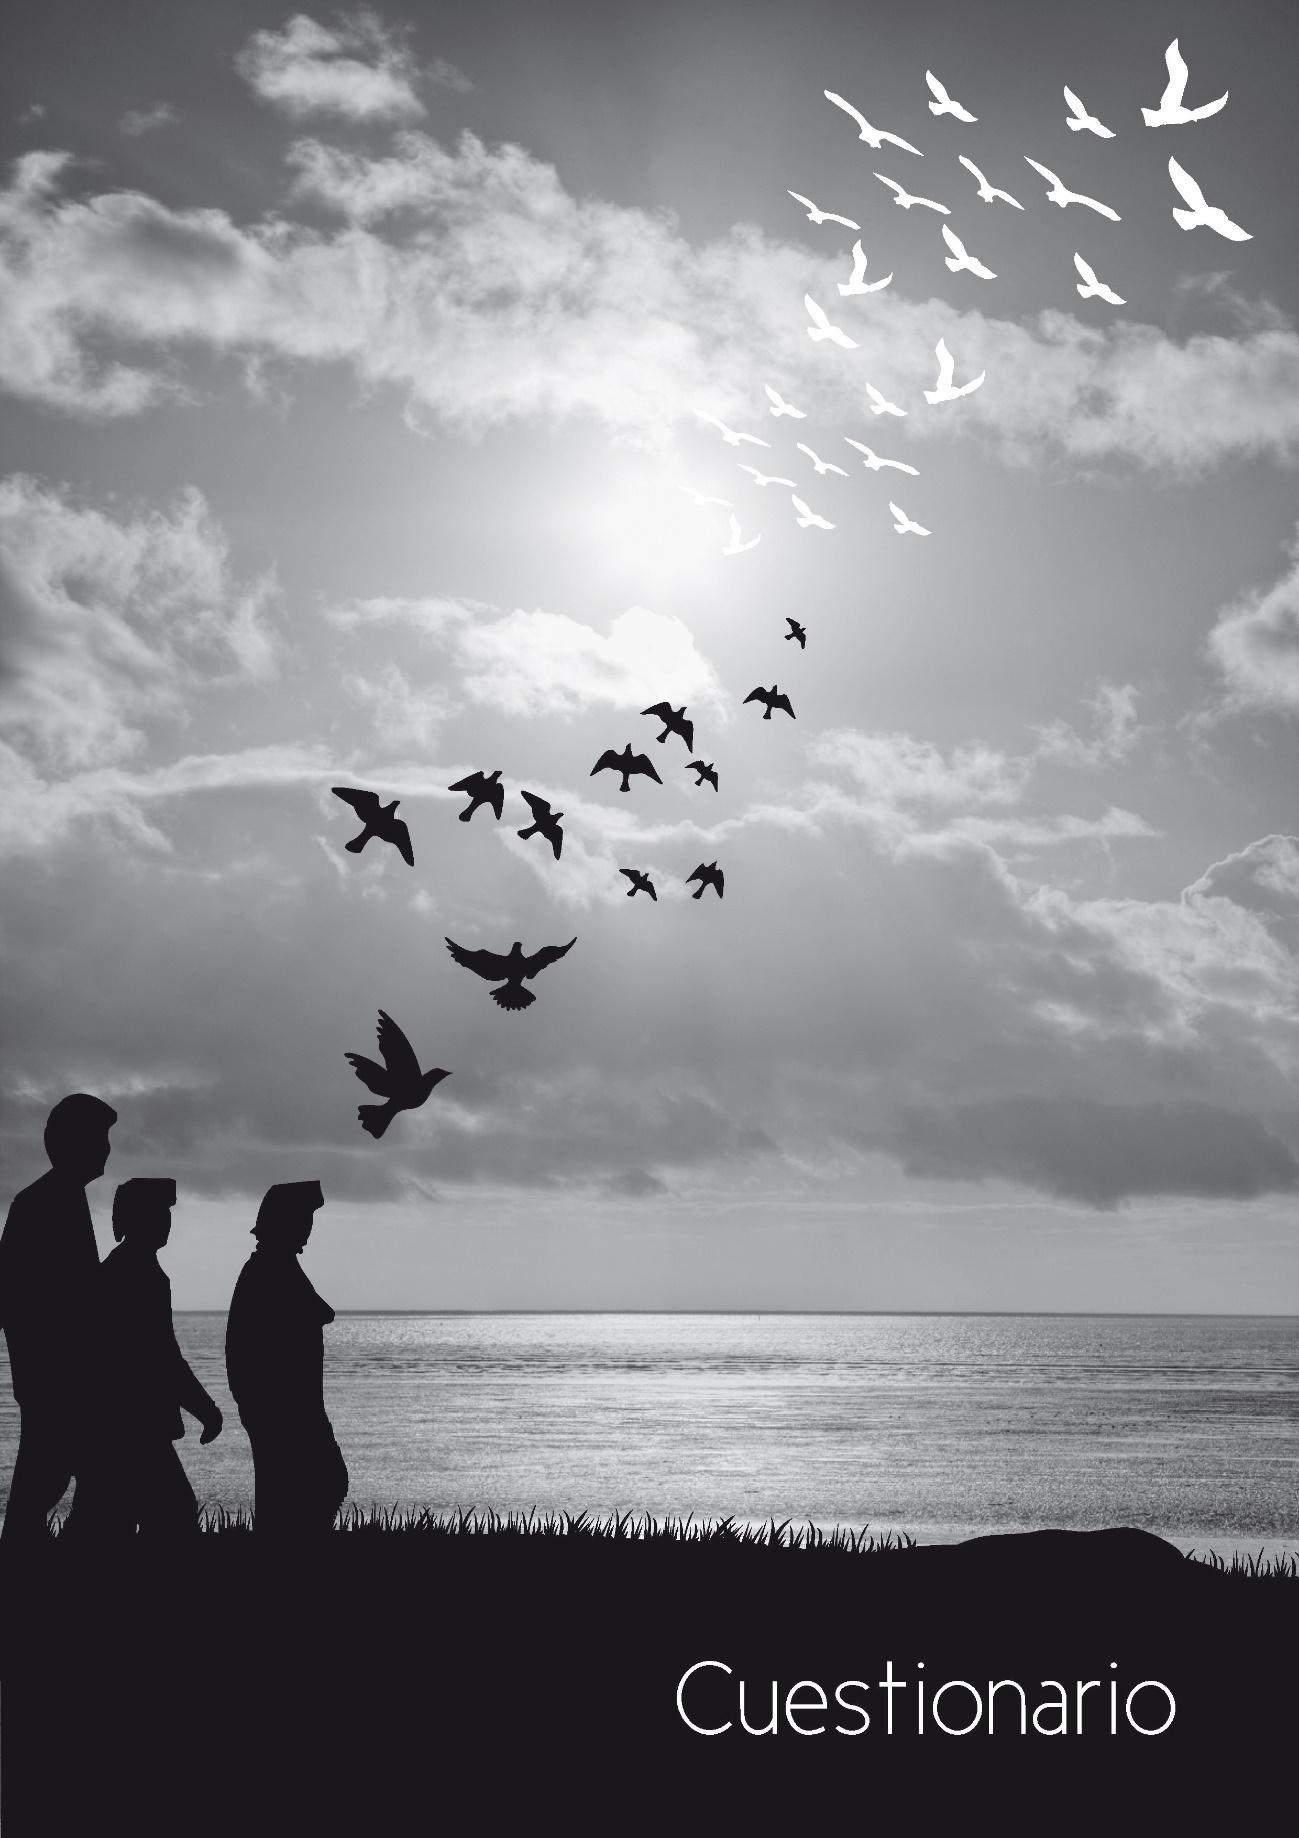


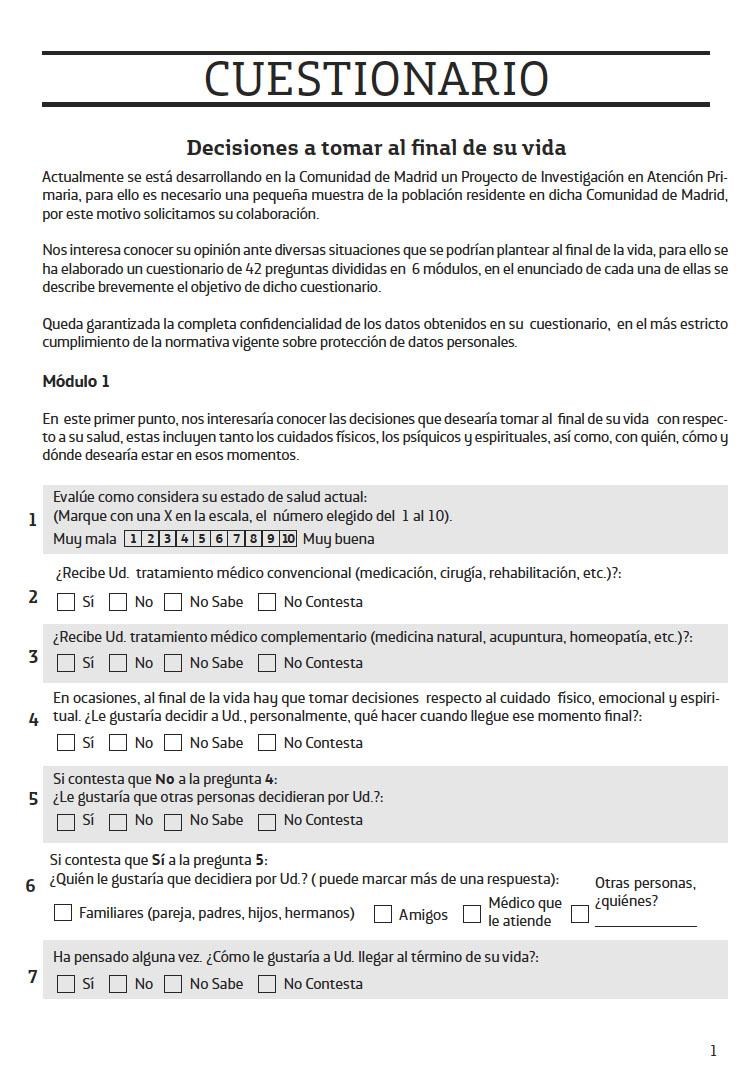


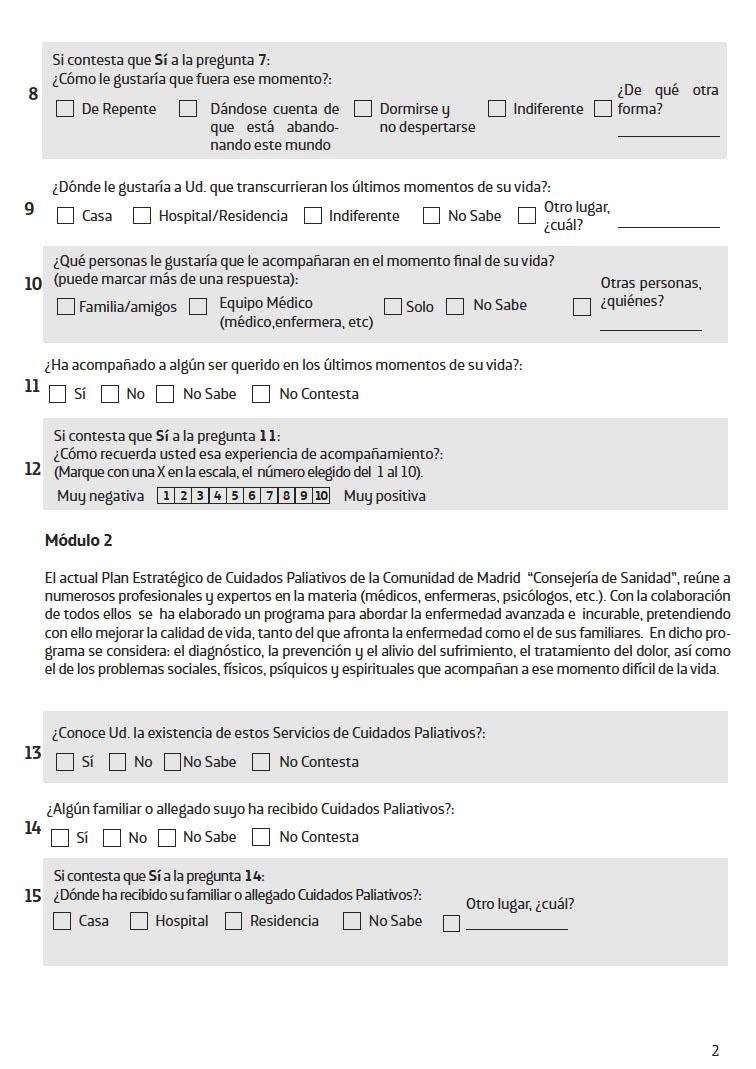


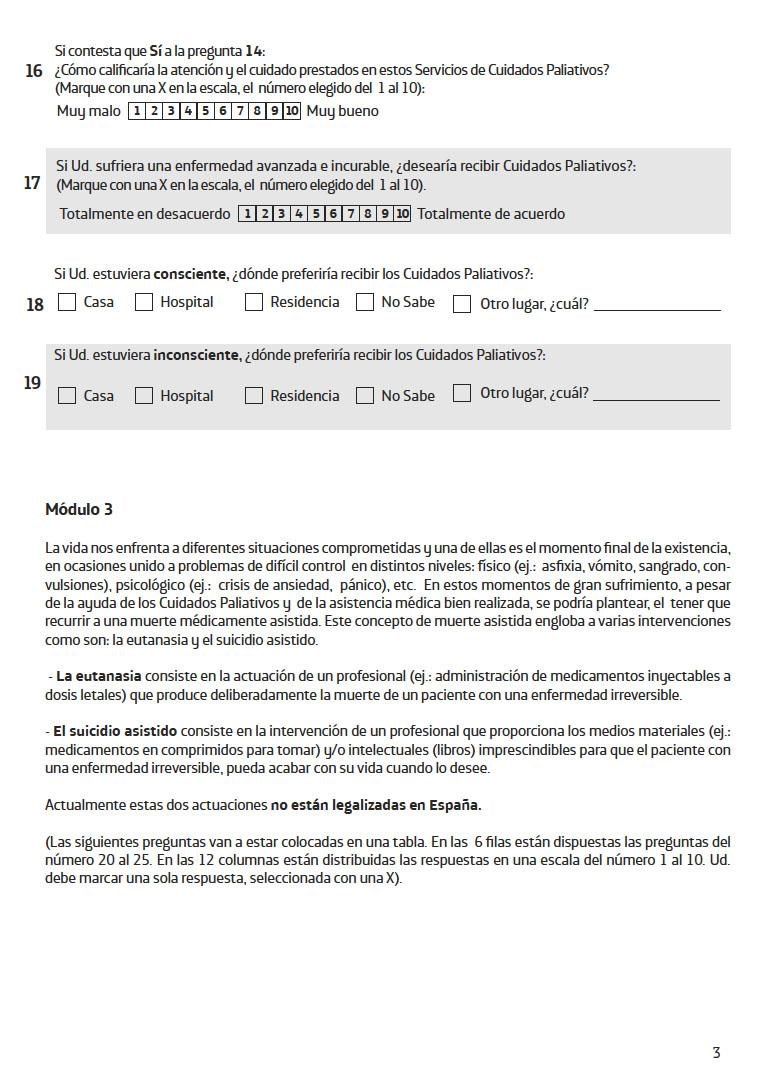


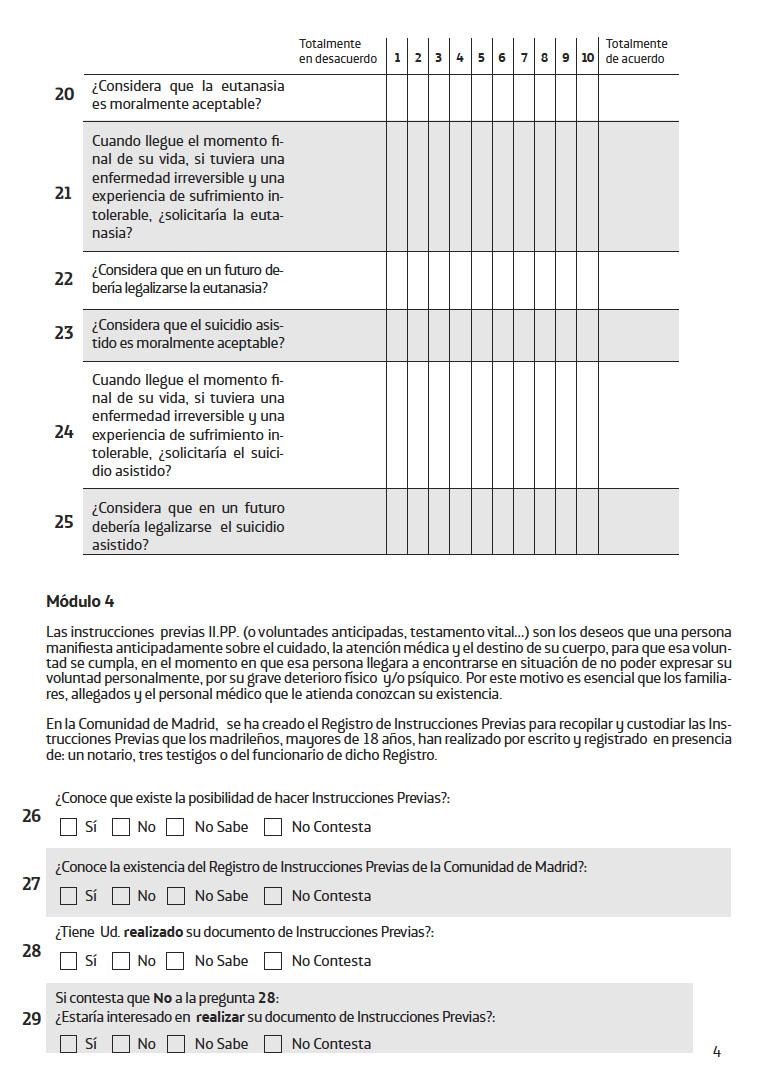


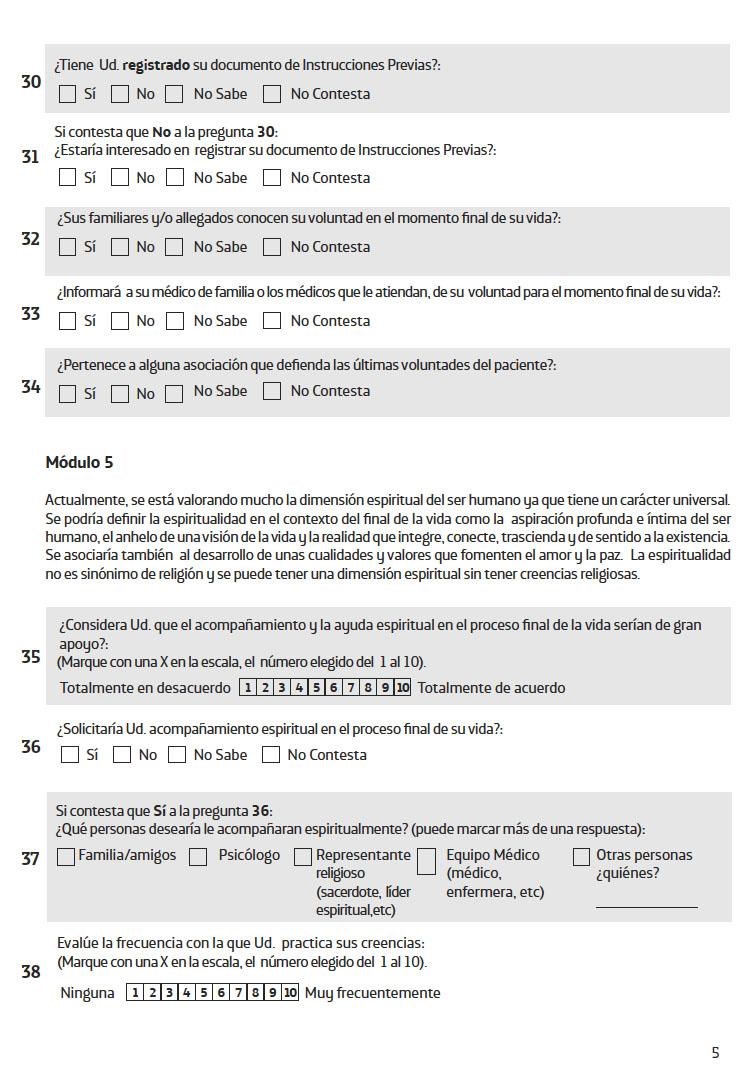
 1

2

3

4

5

6

7

8

9

10

11

12

13

14

15

16

17

18

19

20

21

22

23

24

25

26

27

28

29

30

31

32

33

34

35

36

37

38

39

40

41

42

43

44

45

46

47

48

49

50

51

52

53

54

55

56

57

58

59

60

61

62

63

64

65


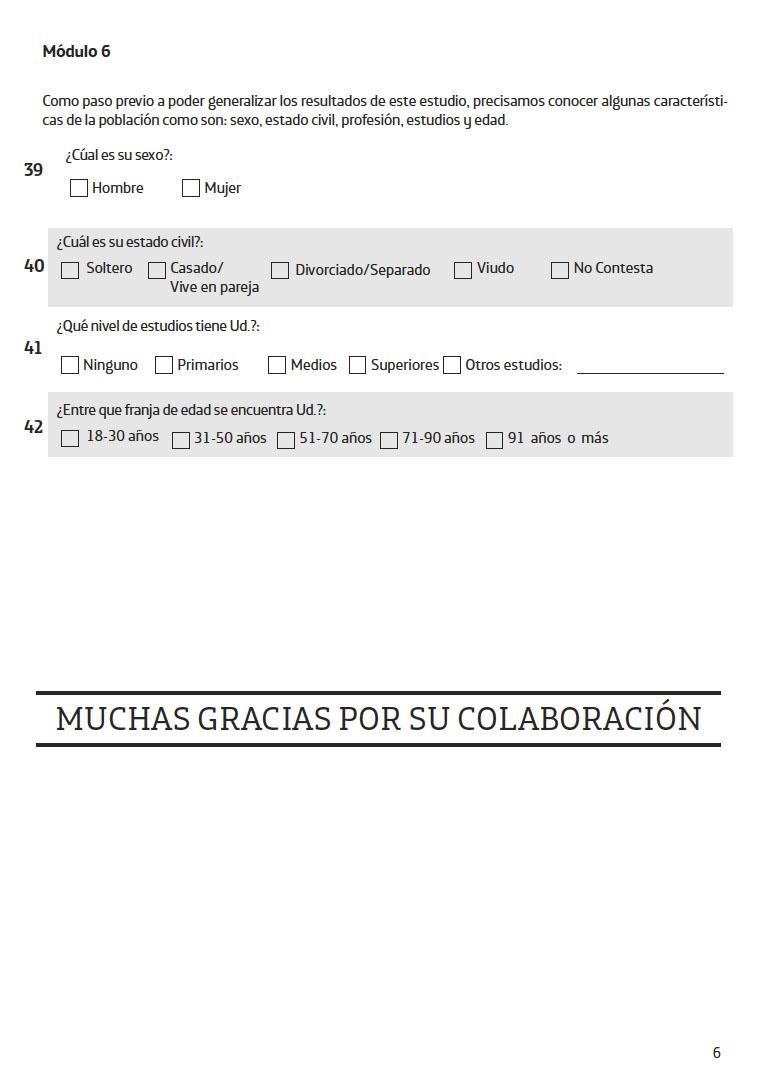

Supplement: mmc1 [file S0213911117303072:mmc1.docx]
